# Supplementary material for: Functional characterization of the circadian clock in the Antarctic krill, Euphausia superba
Source: PubMed Central journal article supplement (PMC5735174; doi:10.1038/s41598-017-18009-2), 2017-12-18
Supplement: 41598_2017_18009_MOESM1_ESM.pdf [file 41598_2017_18009_MOESM1_ESM.pdf]

# Functional characterization of the circadian clock in the Antarctic krill, *Euphausia superba*

Alberto Biscontin<sup>1,2</sup>, Thomas Wallach<sup>1</sup>, Gabriele Sales<sup>2</sup>, Astrid Grudziecki<sup>1</sup>, Leonard Janke<sup>1</sup>, Elena Sartori<sup>2</sup>, Cristiano Bertolucci<sup>3</sup>, Gabriella Mazzotta<sup>2</sup>, Cristiano De Pittà<sup>2</sup>, Bettina Meyer<sup>4,5,6</sup>, Achim Kramer<sup>1,\*</sup>, Rodolfo Costa<sup>2,\*</sup>

<sup>1</sup>Charité-Universitätsmedizin Berlin, Laboratory of Chronobiology, D-10117 Berlin, Germany;

<sup>2</sup>University of Padova, Department of Biology, 35121 Padova, Italy; <sup>3</sup>University of Ferrara, Department of Life Sciences and Biotechnology, 44121 Ferrara, Italy; <sup>4</sup>Alfred Wegener Polar Biological Oceanography, 27570 Bremerhaven, Germany; <sup>5</sup>Carl von Ossietzky University of Oldenburg, Institute for Chemistry and Biology of the Marine Environment, 26129 Oldenburg, Germany; <sup>6</sup>Helmholtz Institute for Functional Marine Biodiversity Oldenburg (HIFMB), 26129 Oldenburg, Germany

\*Corresponding Authors. E-mails: [rodolfo.costa@unipd.it](mailto:rodolfo.costa@unipd.it); [achim.kramer@charite.de](mailto:achim.kramer@charite.de)

Keywords: Antarctic krill; *Euphausia superba*; circadian clock; clock genes

SUPPLEMENTARY FIGURES

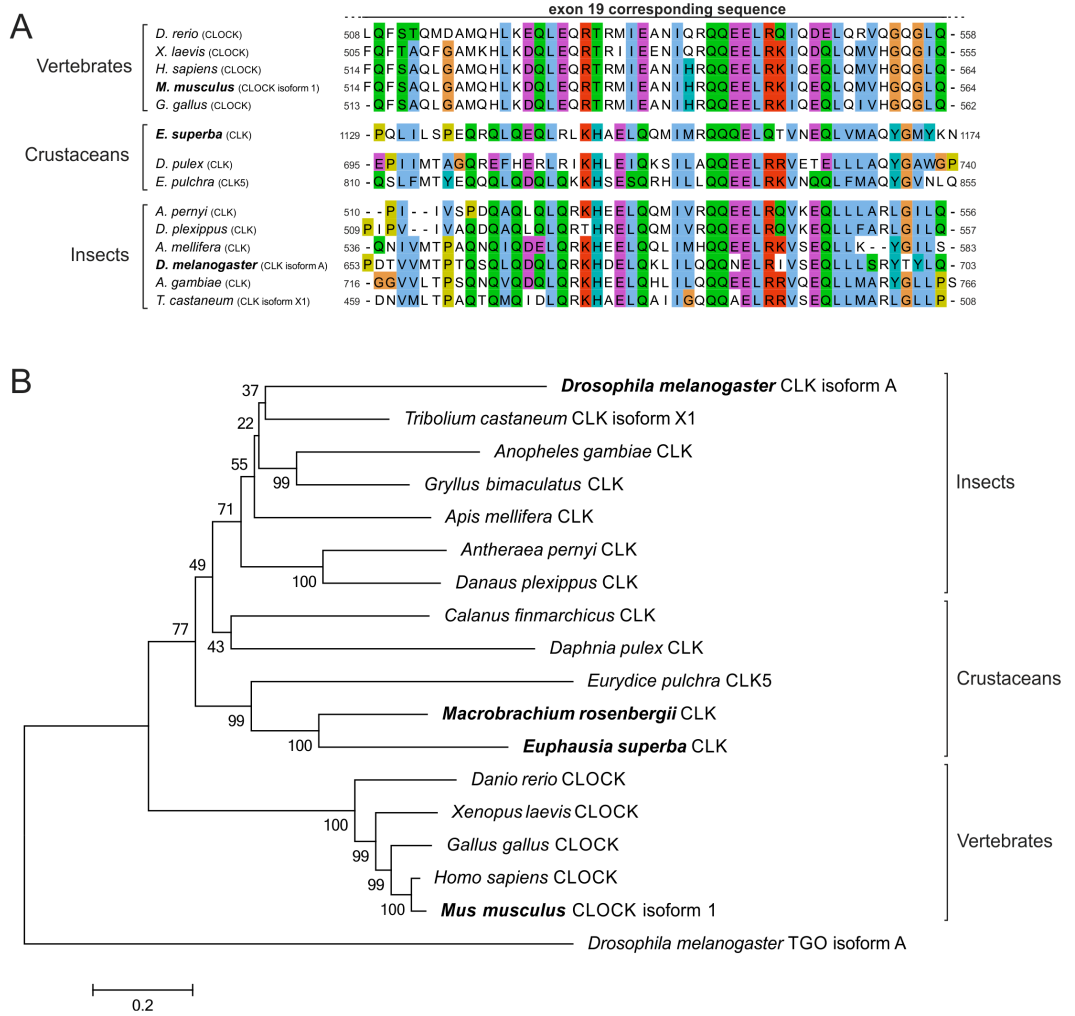

**Fig. S1. EsCLOCK.** (A) Multiple alignment of the CLOCK sequences corresponding to the *mCLOCK*'s exon 19. (B) Phylogenetic relationships of the CLOCK protein family. *EsCLK* clusters with other crustaceans orthologues. The *D. melanogaster*'s bHLH-PAS protein TANGO isoform A has been used as outgroup. Bootstrap confidence values based on 1,000 replicates are shown at nodes. Scale bar indicates amino acid substitutions per site. The most relevant orthologues are indicated in bold.

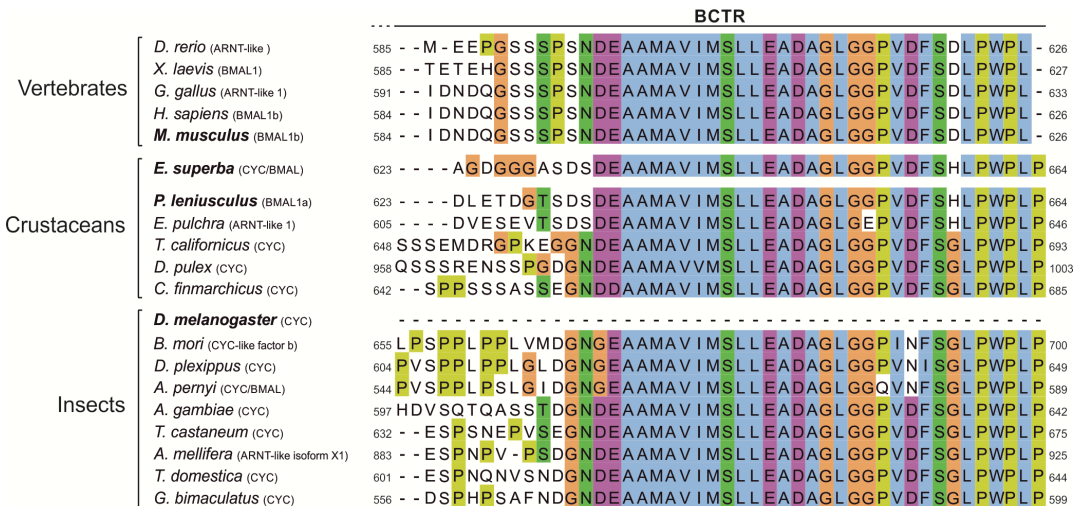

**Fig. S2. EsCYCLE/BMAL.** Multiple alignment of the CYC/BMAL sequences corresponding to the *mBMAL1*'s BCTR domain.

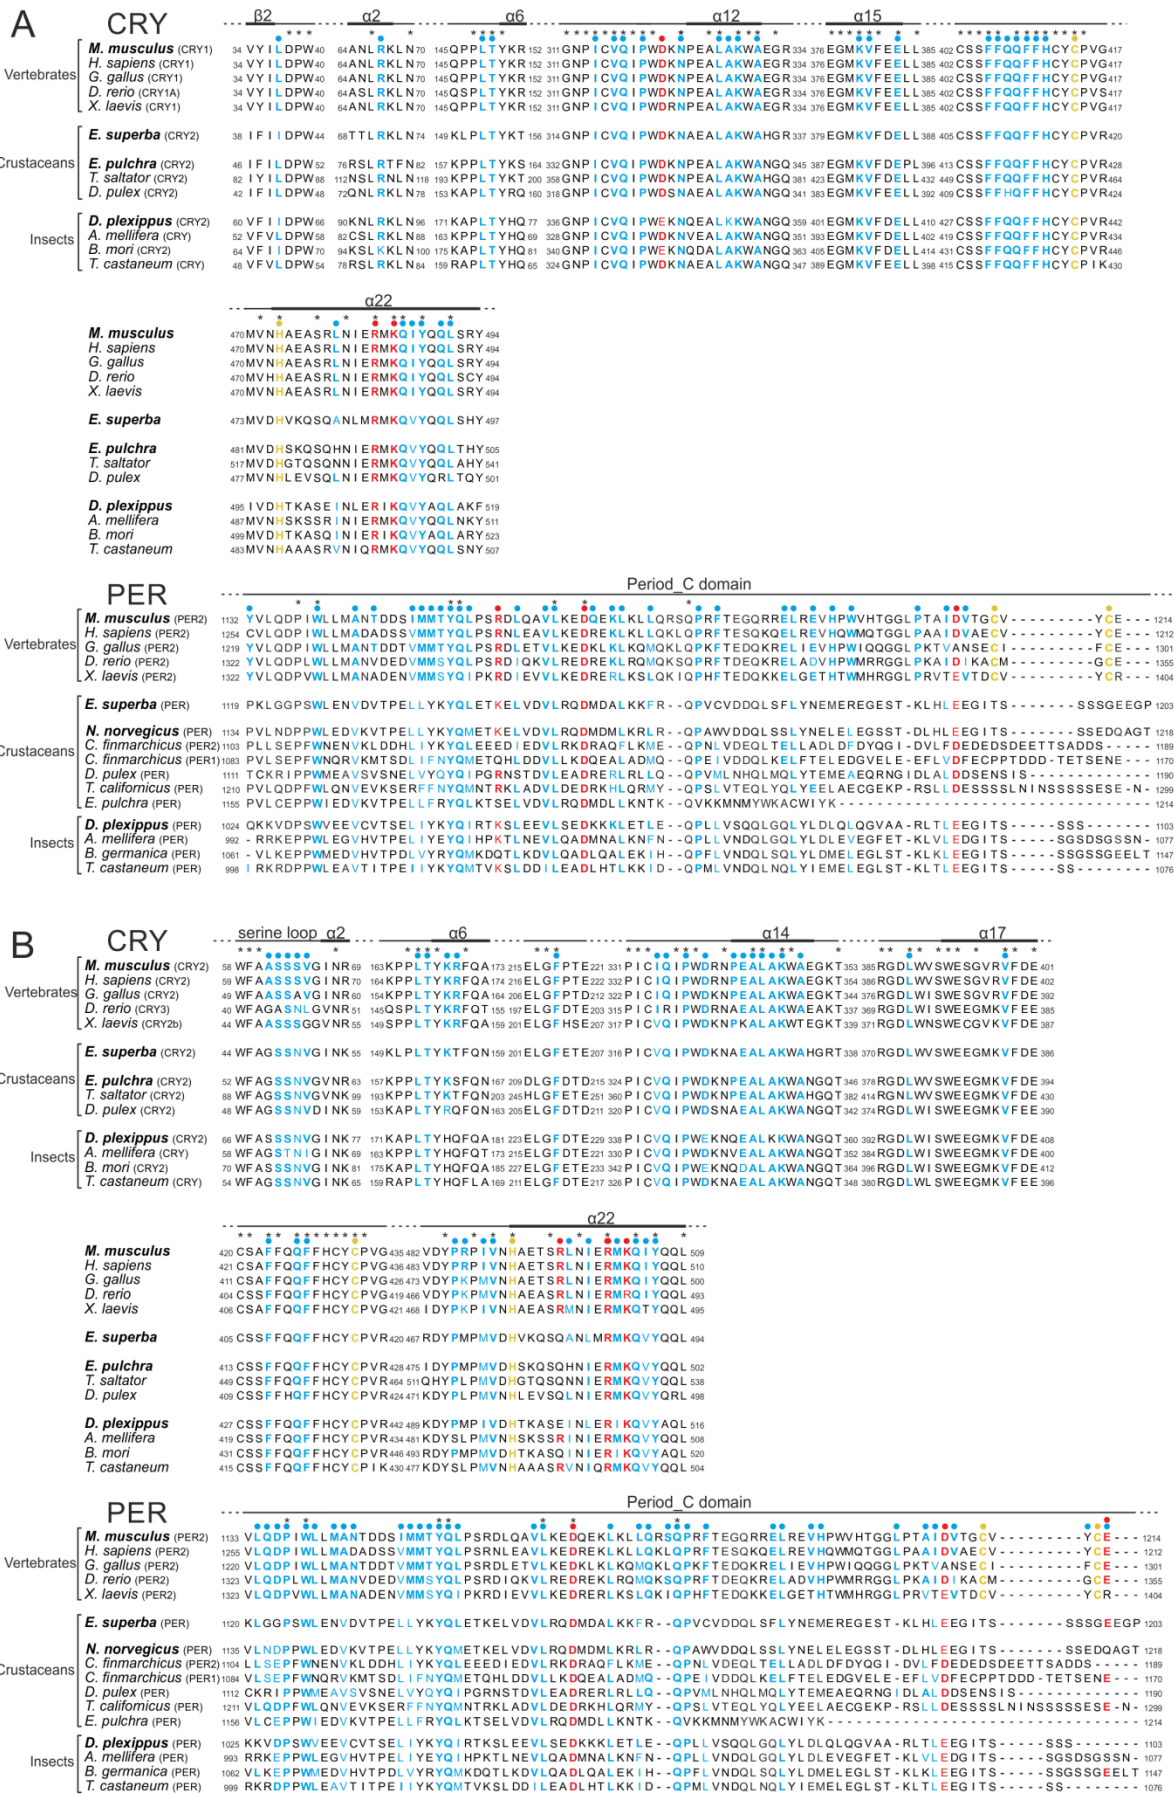

**Fig. S3.** Multiple sequence alignment of domains responsible for the PER/CRYs interaction in mouse according to the *mPER2:mCRY1* (A) and *mPER2:mCRY2* (B) models, respectively. (A) *mPER2:mCRY1* interaction model (7): 29/29 residues involved in low energy interactions, 3/3 residues involved in salt bridges, and 2/2 residues involved in zinc finger are conserved in *EsCRY2*; 15/28 residues involved in low energy interactions, 3/3 residues involved in salt bridges, and 0/2 residues involved in zinc finger are conserved in *EsPER*. (B) *mPER2:mCRY2* interaction model (8): 32/36 residues involved in low energy interactions, 2/3 residues involved in salt bridges, and 2/2 residues involved in zinc finger are conserved in *EsCRY2*; 18/34 residues involved in low energy interactions, 3/3 residues involved in salt bridges, and 0/2 residues involved in zinc finger are conserved in *EsPER*. Coloured residues represent the conserved amino acids (identity in bold font style) involved in low energy interactions (blue), salt bridges (red), and zinc fingers (yellow). \* = the residue is conserved among all the sequences aligned;  $\alpha$  =  $\alpha$ -helix position in *mCRY* sequence.

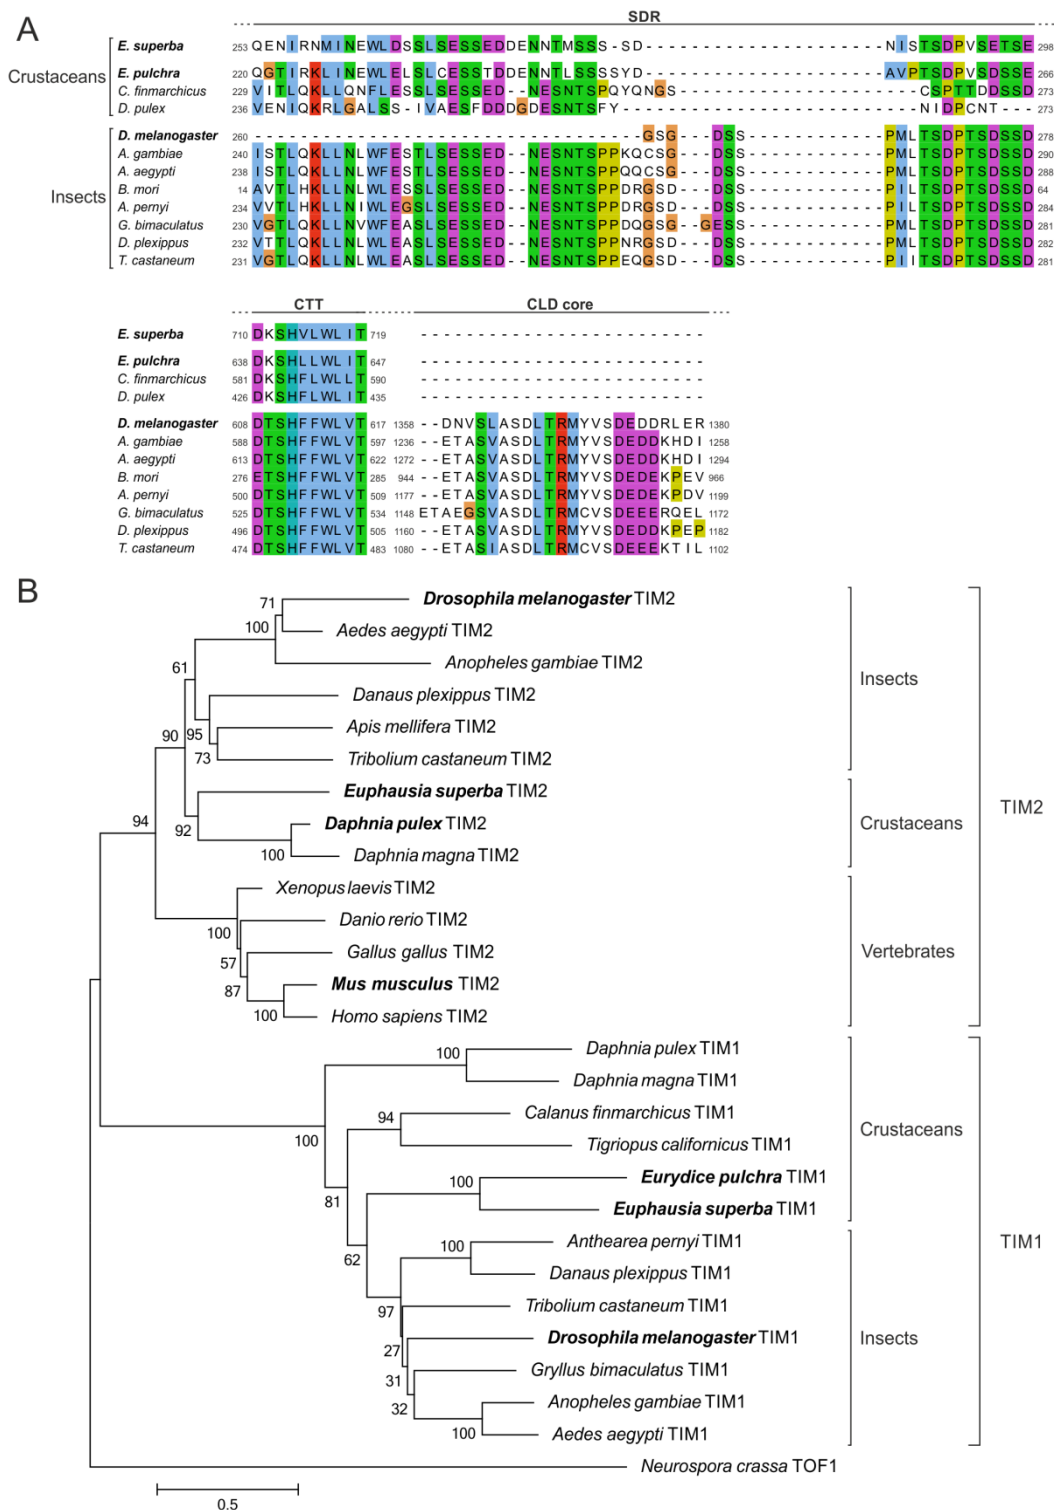

**Fig. S4.** *Es*TIMELESS1. (A) Multiple sequence alignment of serine-rich domain, putative *Es*CRY1 binding site (CTT motif), and the conserved region of the C-terminal cytoplasmic localization domain (CLD core). (B) Phylogenetic relationships of the TIMELESS protein family that confirm the annotations of *Es*TIM1 and *Es*TIM2 as a TIMELESS and TIMEOUT proteins, respectively. The *N. crassa* timeless domain-containing protein TGO1 has been used as outgroup. Bootstrap confidence values based on 1,000 replicates are shown at nodes. Scale bar indicates amino acid substitutions per site. The most relevant orthologues are indicated in bold



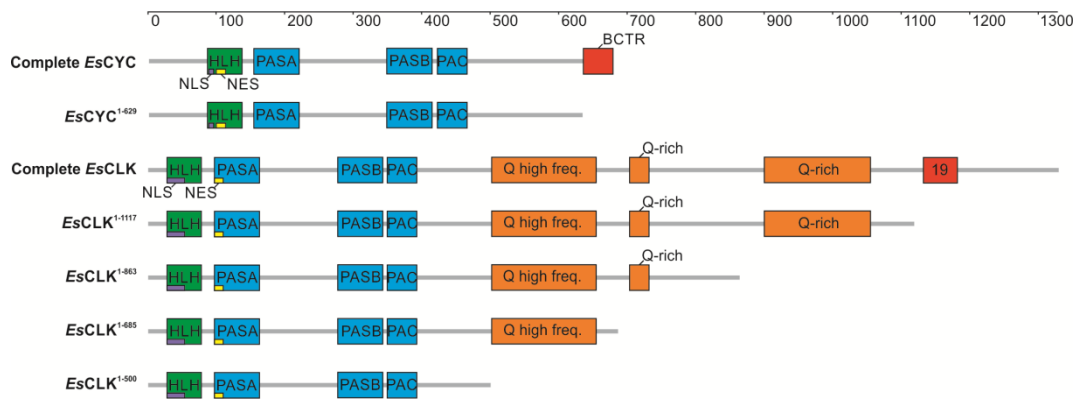

**Fig. S7.** Schematic representation of the constructs used in the Fig. 3D's experiment.

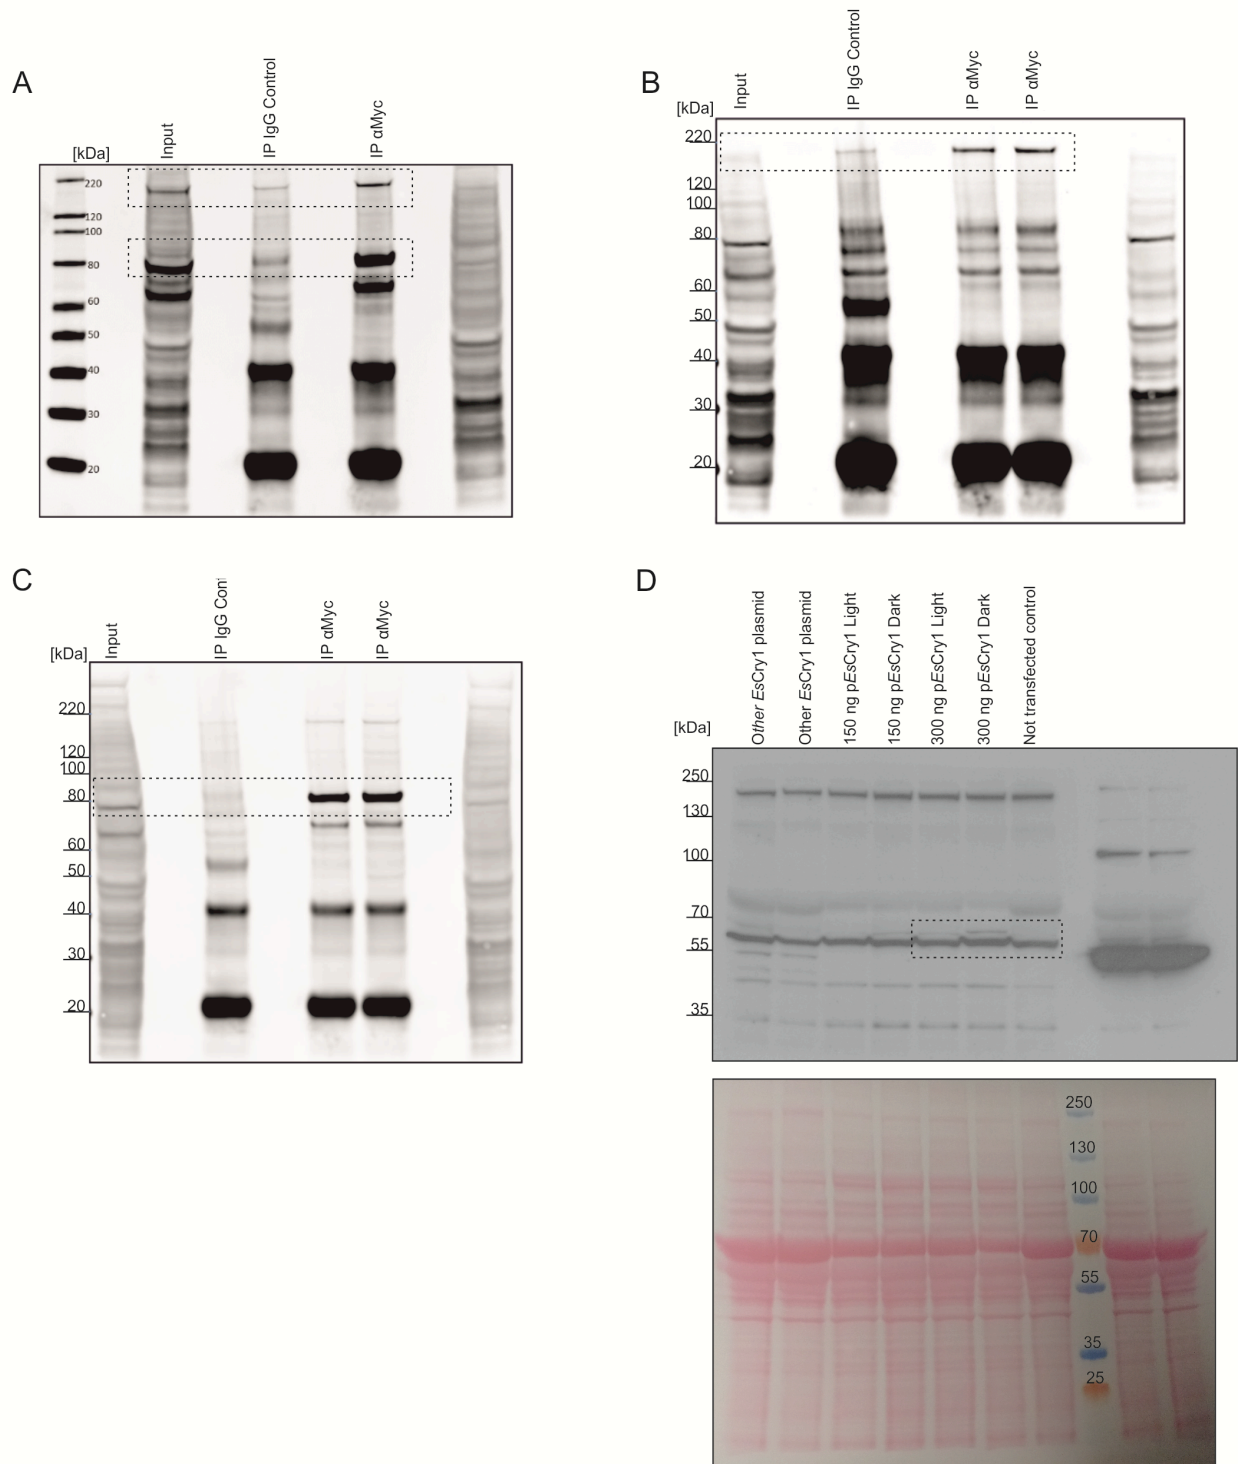

**Fig. S8.** Full-length western blot images. (A) Co-immunoprecipitation of EsCLK-V5 and MYC-EsCYC/BMAL co-expressed in HEK293 cells; experiment 1  $\alpha$ V5+ $\alpha$ Myc, (B) experiment 2  $\alpha$ V5, and (C) experiment 2  $\alpha$ Myc (digital imaging). (D) Western blot of EsCRY1 protein after a 8 hours light pulse in *Drosophila* cells (film exposure) and Ponceau S staining used for total protein normalization (digital imaging). Dashed line rectangles mark bands displayed in the main text figures.

**SUPPLEMENTARY TABLES**

|                                           | Contig resulted from krill database mining |             | Transcript reconstruction by molecular cloning approach |             | Deduced protein information |              | tblastx search statistics |         | Sequence status |
|-------------------------------------------|--------------------------------------------|-------------|---------------------------------------------------------|-------------|-----------------------------|--------------|---------------------------|---------|-----------------|
|                                           | Accession number                           | Length (nt) | GenBank accession number                                | Length (nt) | Protein length (aa)         | Protein type | Score                     | E-value |                 |
| <b>CLOCK</b>                              | ESS034514                                  | 1659        | KY888674                                                | 4652        | 1329                        | F            | 650                       | 0       | Confirmed       |
| <b>CYCLE/BMAL</b>                         | ESS133965                                  | 303         | KY922996                                                | 2767        | 664                         | F            | 911                       | 0       | Confirmed       |
| <b>PERIOD</b>                             | ESS133963                                  | 2339        | KY922997                                                | 4127        | 1261                        | F            | 1117                      | 0       | Confirmed       |
| <b>TIMELESS 1</b>                         | ESS040526                                  | 4047        | KY922998                                                | 5300        | 1311                        | F            | 1094                      | 0       | Confirmed       |
| <b>CRYPTOCHROME 1</b>                     | ESS023688                                  | 1819        | KY922999                                                | 1844        | 533                         | F            | 662                       | 0       | Confirmed       |
| <b>DOUBLETIME</b>                         | ESS096455                                  | 1694        | KY923000                                                | 3342        | 345                         | F            | 667                       | 0       | Validated       |
| <b>SHAGGY</b>                             | ESS074789                                  | 1350        | KY923001                                                | 1966        | 415                         | F            | 666                       | 0       | Validated       |
| <b>VRILLE</b>                             | ESS123359                                  | 1509        | KY923002                                                | 2224        | 488                         | F            | 233                       | 5e-69   | Validated       |
| <b>SLIMB</b>                              | ESS133964                                  | 1350        | KY923003                                                | 1457        | 449                         | C            | 764                       | 0       | Validated       |
| <b>CASEIN KINASE 2<math>\alpha</math></b> | ESS071625                                  | 1722        | -                                                       | -           | 350                         | F            | 629                       | 0       | Validated       |
| <b>CASEIN KINASE 2<math>\beta</math></b>  | ESS051147                                  | 805         | -                                                       | -           | 244                         | N            | 422                       | 3e-148  | Validated       |
| <b>PROTEIN PHOSPHATASE 1A</b>             | ESS073680                                  | 2139        | -                                                       | -           | 329                         | F            | 663                       | 0       | Validated       |
| <b>PROTEIN PHOSPHATASE 2A wbtB</b>        | ESS023456                                  | 3762        | -                                                       | -           | 634                         | F            | 884                       | 0       | Validated       |
| <b>PDH</b>                                | ESS011558                                  | 422         | -                                                       | -           | 79                          | F            | 103                       | 2e-27   | Validated       |
| <b>PDH RECEPTOR</b>                       | ESS048520                                  | 1035        | -                                                       | -           | 344                         | I            | 359                       | 7e-119  | Predicted       |
| <b>CLOCKWORK ORANGE</b>                   | ESS049812                                  | 2084        | -                                                       | -           | 629                         | F            | 226                       | 2e-62   | Predicted       |
| <b>EZH 2</b>                              | ESS108699                                  | 1719        | -                                                       | 2684        | 804                         | F            | 984                       | 0       | Predicted       |
| <b>HDAC 3</b>                             | ESS014944                                  | 1677        | -                                                       | 4139        | 488                         | F            | 817                       | 0       | Predicted       |
| <b>CREB binding protein</b>               | ESS048098                                  | 2180        | -                                                       | 5322        | 1301                        | C            | 1387                      | 0       | Predicted       |
| <b>TIMELESS 2</b>                         | ESS130297                                  | 2077        | KY923004                                                | 4638        | 1364                        | F            | 966                       | 0       | Validated       |

**Table S1.** Putative *Euphausia superba* circadian protein-encoding transcripts identified via *in silico* transcriptome mining. Protein type: F = full coding sequence; N = amino-terminal partial protein; I = internal protein fragment; C = carboxy-terminal partial protein. Sequence status: Confirmed = functionally confirmed component; Validated = sequence validated by molecular cloning; Predicted = *in silico* predicted sequence.



|                      | aa position | Sequence                                                    | Description                                                                                                                                                                                                         |
|----------------------|-------------|-------------------------------------------------------------|---------------------------------------------------------------------------------------------------------------------------------------------------------------------------------------------------------------------|
| <b>EsCLK</b><br>NLS  | 27-58       | RNLSEKKRRDQFNLLINELSVMVA<br>ANNRKMMDKST                     | <ul style="list-style-type: none"> <li>highly conserved</li> </ul>                                                                                                                                                  |
| NES                  | 102-113     | LEALDGGFFLAI                                                | <ul style="list-style-type: none"> <li>highly conserved</li> </ul>                                                                                                                                                  |
| <b>EsCYC</b><br>NLS  | 87-93       | EKRRRDK                                                     | <ul style="list-style-type: none"> <li>highly conserved</li> </ul>                                                                                                                                                  |
| NES                  | 112-121     | LDKLTVLRM                                                   | <ul style="list-style-type: none"> <li>highly conserved</li> </ul>                                                                                                                                                  |
| <b>EsPER</b><br>NLS  | 523-532     | EPAEKRRRTL                                                  | <ul style="list-style-type: none"> <li>conserved among crustaceans</li> </ul>                                                                                                                                       |
|                      | 704-739     | RHNVDQQQHKFVQKQRTTHKHSK<br>RFKIKNI                          | <ul style="list-style-type: none"> <li>conserved in <i>D. melanogaster</i>, with only small effect</li> </ul>                                                                                                       |
| NES                  | 744-765     | KKATKRPHGLKRPGTIMDRECSAP<br>KQIYM                           | <ul style="list-style-type: none"> <li>principal NLS in <i>D. melanogaster</i>, not detected by NLSmapper</li> </ul>                                                                                                |
|                      | 502-511     | AQNYIVELLA                                                  | <ul style="list-style-type: none"> <li>principal NES in <i>D. melanogaster</i>, the distribution of the hydrophobic residues, albeit not the exact consensus sequence, is conserved in <i>E. superba</i></li> </ul> |
| CLD                  | 426-476     | GRPHRSKPYRFRTFNGSYVTLET<br>EWLCFVNPWTMKIDSVIGQHRVIK<br>GPED | <ul style="list-style-type: none"> <li>highly conserved</li> </ul>                                                                                                                                                  |
| <b>EsTIM1</b><br>NLS | 612-621     | GPACKRPHHQ                                                  | <ul style="list-style-type: none"> <li>conserved in <i>E. superba</i> and <i>E. pulchra</i></li> </ul>                                                                                                              |
|                      | 643-651     | RNVKRTKLL                                                   | <ul style="list-style-type: none"> <li>highly conserved among insects and crustaceans</li> </ul>                                                                                                                    |
| <b>EsCRY2</b><br>NLS | 278-282     | RKIKK                                                       | <ul style="list-style-type: none"> <li>conserved in <i>M. musculus</i>, with only small effect</li> </ul>                                                                                                           |

**Table S2.** Localization signals identified in the main components of krill circadian clock. Abbreviation: NLS = nuclear localization signal; NES = nuclear export signal; CLD = cytoplasmic localization domain.

| Figure                                                           | Experimental comparison                                              |                                                                      | t-test adjusted p-value |
|------------------------------------------------------------------|----------------------------------------------------------------------|----------------------------------------------------------------------|-------------------------|
| Fig. 4B                                                          | E-Box-Luc                                                            | E-Box-Luc + <b>EsCyc/Bmal</b>                                        | 0.027                   |
|                                                                  |                                                                      | E-Box-Luc + <b>EsClk</b>                                             | 0.272                   |
|                                                                  |                                                                      | E-Box-Luc + <b>EsCyc/Bmal + EsClk</b>                                | 0.004                   |
| Fig. 4B                                                          | E-Box-Luc                                                            | E-Box-Luc + <b>EsCyc/Bmal</b>                                        | 0.008                   |
|                                                                  |                                                                      | E-Box-Luc + <b>EsClk</b>                                             | 0.016                   |
|                                                                  |                                                                      | E-Box-Luc + <b>EsCyc/Bmal + EsClk</b>                                | 0.011                   |
| Fig. 4D                                                          | E-Box-Luc + <i>EsCyc/Bmal + EsClk</i>                                | E-Box-Luc + <b>EsCyc</b> <sup>1-829</sup> + <i>EsClk</i>             | 1.7E-04                 |
|                                                                  |                                                                      | E-Box-Luc + <i>EsCyc</i> + <b>EsClk</b> <sup>1-1117</sup>            | 1.6E-04                 |
|                                                                  |                                                                      | E-Box-Luc + <i>EsCyc + EsClk</i> <sup>1-863</sup>                    | 1.8E-04                 |
|                                                                  |                                                                      | E-Box-Luc + <i>EsCyc + EsClk</i> <sup>1-685</sup>                    | 1.5E-04                 |
|                                                                  | E-Box-Luc + <i>EsCyc + EsClk</i> <sup>1-1117</sup>                   | E-Box-Luc + <i>EsCyc + EsClk</i> <sup>1-500</sup>                    | 1.8E-04                 |
|                                                                  |                                                                      | E-Box-Luc + <i>EsCyc + EsClk</i> <sup>1-863</sup>                    | 0.025                   |
|                                                                  |                                                                      | E-Box-Luc + <i>EsCyc + EsClk</i> <sup>1-685</sup>                    | 0.051                   |
|                                                                  |                                                                      | E-Box-Luc + <i>EsCyc + EsClk</i> <sup>1-500</sup>                    | 0.935                   |
| Fig. 4E                                                          | E-Box-Luc + <i>EsCyc/Bmal + EsClk</i>                                | E-Box-Luc + <b>dCyc + EsClk</b>                                      | 9.9E-05                 |
|                                                                  |                                                                      | E-Box-Luc + <i>EsCyc/Bmal + dClk</i>                                 | 9.4E-06                 |
|                                                                  | E-Box-Luc + <i>dCyc + dClk</i>                                       | E-Box-Luc + <b>dCyc + EsClk</b>                                      | 1.2E-05                 |
|                                                                  |                                                                      | E-Box-Luc + <i>EsCyc/Bmal + dClk</i>                                 | 1.1E-04                 |
| Fig. 4F                                                          | E-Box-Luc + <i>EsCyc/Bmal + EsClk</i>                                | E-Box-Luc + <b>mBmal1 + EsClk</b>                                    | 9.4E-04                 |
|                                                                  |                                                                      | E-Box-Luc + <i>EsCyc/Bmal + mClock</i>                               | 0.007                   |
|                                                                  | E-Box-Luc + <i>mBmal1 + mClock</i>                                   | E-Box-Luc + <b>mBmal1 + EsClk</b>                                    | 2.0E-04                 |
|                                                                  |                                                                      | E-Box-Luc + <i>EsCyc/Bmal + mClock</i>                               | 0.008                   |
| Fig. 5A                                                          | Light<br>E-Box-Luc + <i>EsCyc/Bmal + EsClk</i>                       | Light<br>E-Box-Luc + <i>EsCyc/Bmal + EsClk + EsCry1</i>              | 0.120                   |
|                                                                  |                                                                      | Light<br>E-Box-Luc + <i>EsCyc/Bmal + EsClk + EsCry2</i>              | 0.002                   |
|                                                                  | Dark<br>E-Box-Luc + <i>EsCyc/Bmal + EsClk</i>                        | Dark<br>E-Box-Luc + <i>EsCyc/Bmal + EsClk + EsCry1</i>               | 0.050                   |
|                                                                  |                                                                      | Dark<br>E-Box-Luc + <i>EsCyc/Bmal + EsClk + EsCry2</i>               | 9.4E-04                 |
| Fig. 5B                                                          | E-Box-Luc + <i>EsCyc/Bmal + EsClk</i>                                | E-Box-Luc + <i>EsCyc/Bmal + EsClk + EsCry1</i>                       | 1                       |
|                                                                  |                                                                      | E-Box-Luc + <i>EsCyc/Bmal + EsClk + EsCry2</i>                       | 0.010                   |
| Fig. 5C                                                          | Dark                                                                 | Light                                                                | 0.007                   |
| Fig. 5D                                                          | E-Box-Luc + <i>EsCyc/Bmal + EsClk</i>                                | E-Box-Luc + <i>EsCyc/Bmal + EsClk + EsCry2</i>                       | 0.002                   |
|                                                                  |                                                                      | E-Box-Luc + <i>EsCyc/Bmal + EsClk + EsPer</i>                        | 0.062                   |
|                                                                  |                                                                      | E-Box-Luc + <i>EsCyc/Bmal + EsClk + EsTim1</i>                       | 0.184                   |
|                                                                  |                                                                      | E-Box-Luc + <i>EsCyc/Bmal + EsClk + EsPer + EsTim1</i>               | 0.002                   |
|                                                                  |                                                                      | E-Box-Luc + <i>EsCyc/Bmal + EsClk + EsCry2 + EsPer</i>               | 0.002                   |
|                                                                  |                                                                      | E-Box-Luc + <i>EsCyc/Bmal + EsClk + EsCry2 + EsTim1</i>              | 0.002                   |
|                                                                  | E-Box-Luc + <i>EsCyc/Bmal + EsClk + EsCry2</i>                       | E-Box-Luc + <i>EsCyc/Bmal + EsClk + EsPer + EsTim1</i>               | 0.035                   |
|                                                                  |                                                                      | E-Box-Luc + <i>EsCyc/Bmal + EsClk + EsCry2 + EsPer</i>               | 0.018                   |
|                                                                  | E-Box-Luc + <i>EsCyc/Bmal + EsClk + EsPer + EsTim1</i>               | E-Box-Luc + <i>EsCyc/Bmal + EsClk + EsCry2 + EsPer</i>               | 0.335                   |
|                                                                  |                                                                      | E-Box-Luc + <i>EsCyc/Bmal + EsClk + 1:20 EsCry2 + EsPer</i>          | 3.8E-04                 |
|                                                                  | E-Box-Luc + <i>EsCyc/Bmal + EsClk + 1:20 EsCry2</i>                  | E-Box-Luc + <i>EsCyc/Bmal + EsClk + 1:20 EsCry2 + EsTim1</i>         | 0.337                   |
|                                                                  |                                                                      | E-Box-Luc + <i>EsCyc/Bmal + EsClk + 1:20 EsCry2 + EsPer + EsTim1</i> | 8.8E-06                 |
| E-Box-Luc + <i>EsCyc/Bmal + EsClk + 1:20 EsCry2 + EsPer</i>      | E-Box-Luc + <i>EsCyc/Bmal + EsClk + 1:20 EsCry2 + EsPer + EsTim1</i> | 0.002                                                                |                         |
|                                                                  | E-Box-Luc + <i>EsCyc/Bmal + EsClk + 1:20 EsPer + EsTim1</i>          | 0.421                                                                |                         |
| E-Box-Luc + <i>EsCyc/Bmal + EsClk + 1:20 EsPer + 1:20 EsTim1</i> | E-Box-Luc + <i>EsCyc/Bmal + EsClk + EsPer + 1:20 EsTim1</i>          | 5.2E-05                                                              |                         |
|                                                                  | E-Box-Luc + <i>EsCyc/Bmal + EsClk + EsCry2</i>                       | 0.003                                                                |                         |
| Fig. 5E                                                          | E-Box-Luc + <i>EsCyc/Bmal + EsClk</i>                                | E-Box-Luc + <i>EsCyc/Bmal + EsClk + EsPer</i>                        | 0.442                   |
|                                                                  |                                                                      | E-Box-Luc + <i>EsCyc/Bmal + EsClk + EsPer + EsTim1</i>               | 0.015                   |
| Fig. 5F                                                          | IgG control                                                          | A-V5                                                                 | 0.002                   |

Table S3. Student's t-test Bonferroni-corrected p-values for all the experimental comparisons discussed.

|                                   | CLOCK                           | CYCLE /BMAL                  | PERIOD                                               | TIME-LESS         | TIME-OUT       | Vertebrate-like CRY                                                                                    | <i>Drosophila</i> -like CRY | Other CRYs        | (6-4)-photolyase  | Outgroup                    |
|-----------------------------------|---------------------------------|------------------------------|------------------------------------------------------|-------------------|----------------|--------------------------------------------------------------------------------------------------------|-----------------------------|-------------------|-------------------|-----------------------------|
| <i>Aedes aegypti</i>              | -                               | AEX32872.1                   | -                                                    | AAY40757.1        | XP_001660177.1 | -                                                                                                      | -                           | -                 | -                 | -                           |
| <i>Anopheles gambiae</i>          | XP_315720.4                     | XP_556301.3                  | XP_321212.4                                          | XP_001689006.1    | XP_001689129.1 | ABB29887.1                                                                                             | XP_321104.4                 | -                 | -                 | -                           |
| <i>Antheraea pernyi</i>           | AAR14936.1                      | AAR14937.1 (BMAL)            | Q17062.1                                             | AAF66996.1        | -              | ABO38435.1                                                                                             | AAK11644.1                  | -                 | -                 | -                           |
| <i>Apis mellifera</i>             | XP_394233.4                     | XP_001121441.2 (ARNT-like 1) | NP_001011596.1                                       | -                 | XP_006565496.1 | NP_001077099.1                                                                                         | -                           | -                 | -                 | -                           |
| <i>Arabidopsis thaliana</i>       | -                               | -                            | -                                                    | -                 | -              | -                                                                                                      | -                           | -                 | -                 | NP_567341.1 (Plant CRY)     |
| <i>Bactrocera tryoni</i>          | -                               | -                            | -                                                    | -                 | -              | -                                                                                                      | AAU14170.1                  | -                 | -                 | -                           |
| <i>Blattella germanica</i>        | -                               | -                            | AAN02439.2                                           | -                 | -              | -                                                                                                      | -                           | -                 | -                 | -                           |
| <i>Bombus impatiens</i>           | -                               | -                            | -                                                    | -                 | -              | NP_001267051.1                                                                                         | -                           | -                 | -                 | -                           |
| <i>Bombyx mori</i>                | -                               | NP_001036982.1 (CYC-like b)  | BAD93177.1                                           | NP_001037622.1    | -              | NP_001182627.1                                                                                         | NP_001182628.1              | -                 | -                 | -                           |
| <i>Calanus finmarchicus</i>       | comp76772_cl_seq1               | comp160482_c0_seq1           | compl71214_c0_seq1 (PER1); comp205215_c0_seq1 (PER2) | comp88114_c0_seq1 | -              | -                                                                                                      | comp37700_c0_seq1           | -                 | -                 | -                           |
| <i>Ceratitis capitata</i>         | -                               | -                            | ABB20914.1                                           | -                 | -              | -                                                                                                      | -                           | -                 | -                 | -                           |
| <i>Danaus plexippus</i>           | EHJ69324.1                      | AAR13012.1                   | EHJ74075.1                                           | EHJ67997.1        | EHJ67605.1     | ABA62409.1                                                                                             | AAX58599.1                  | -                 | -                 | -                           |
| <i>Danio rerio</i>                | AAI63244.1                      | NP_571652.1 (ARNT-like 1)    | AAO38747.1 (PER2)                                    | -                 | NP_001265529.1 | NP_001070765.2 (CRY1a); NP_571865.4 (CRY1b); BAA96848.1 (CRY2a); BAA96849.1 (CRY2b); BAA96850.1 (CRY3) | -                           | AAH44385.1 (CRY4) | AAH44204.1 (CRY5) | -                           |
| <i>Daphnia magna</i>              | -                               | -                            | -                                                    | JAN75617.1        | JAN88373.1     | -                                                                                                      | KZS20490.1                  | -                 | -                 | -                           |
| <i>Daphnia pulex</i>              | NCBI_GNO_118274                 | NCBI_GNO_1144014             | NCBI_GNO_212404                                      | NCBI_GNO_238244   | NCBI_GNO_88264 | EFX82092.1                                                                                             | EFX77441.1                  | -                 | -                 | -                           |
| <i>Dianemobius nigrofasciatus</i> | -                               | -                            | -                                                    | -                 | -              | -                                                                                                      | BAF45421.1                  | -                 | -                 | -                           |
| <i>Drosophila melanogaster</i>    | NP_523964.2 (CLK isoform A)     | NP_524168.2                  | NP_525056.2                                          | AAC46920.1        | AAF73481.1     | -                                                                                                      | NP_732407.1                 | -                 | NP_477188.1       | NP_731308.1 (TG0 isoform A) |
| <i>Eurydice pulchra</i>           | AGV28720.1 (CLK5)               | AGV28715.1 (ARNT-like 1)     | AGV28714.1                                           | AGV28716.1        | -              | AGV28717.1                                                                                             | -                           | -                 | -                 | -                           |
| <i>Gallus gallus</i>              | AAL98708.1                      | NP_001001463.1               | NP_989593.1 (PER2)                                   | -                 | -              | NP_989576.1 (CRY1); NP_989575.1 (CRY2)                                                                 | NP_00103468.5.1 (CRY4)      | -                 | -                 | -                           |
| <i>Gryllus bimaculatus</i>        | BAM76759.1                      | BAN28450.1                   | BAG48878.1                                           | BAJ16356.1        | -              | -                                                                                                      | -                           | -                 | -                 | -                           |
| <i>Homo sapiens</i>               | AAF13733.1                      | BAA19935.1 (BMAL1b)          | NP_073728.1 (PER2)                                   | -                 | BAA36499.1     | NP_004066.1 (CRY1); NP_001120929.1 (CRY2)                                                              | -                           | -                 | -                 | NP_001612.1 (ARNT)          |
| <i>Macrobrachium rosenbergii</i>  | AAX44045.1                      | -                            | -                                                    | -                 | -              | -                                                                                                      | -                           | -                 | -                 | -                           |
| <i>Mamestra brassicae</i>         | -                               | -                            | -                                                    | -                 | -              | -                                                                                                      | AAY23345.1                  | -                 | -                 | -                           |
| <i>Mus musculus</i>               | NP_031741.1 (CLOCK isoform 1)   | BAD26600.1 (BMAL1b)          | NP_035196.2 (PER2)                                   | -                 | NP_001129554.1 | NP_031797.1 (CRY1); NP_034093.1 (CRY2)                                                                 | -                           | -                 | -                 | -                           |
| <i>Nephrops norvegicus</i>        | -                               | -                            | ALC74274.1                                           | -                 | -              | -                                                                                                      | -                           | -                 | -                 | -                           |
| <i>Neurospora crassa</i>          | -                               | -                            | -                                                    | -                 | -              | -                                                                                                      | -                           | -                 | -                 | XP_958771.1 (TOF1)          |
| <i>Pacifastacus leniusculus</i>   | -                               | AFV39705.1 (BMAL1a)          | -                                                    | -                 | -              | -                                                                                                      | -                           | -                 | -                 | -                           |
| <i>Talitrus saltator</i>          | -                               | -                            | -                                                    | -                 | -              | AFV96168.1                                                                                             | -                           | -                 | -                 | -                           |
| <i>Thermobia domestica</i>        | -                               | BAJ16354.1                   | -                                                    | -                 | -              | -                                                                                                      | -                           | -                 | -                 | -                           |
| <i>Tigriopus californicus</i>     | -                               | JW523145                     | JW535312                                             | JW538330          | -              | -                                                                                                      | -                           | -                 | -                 | -                           |
| <i>Tribolium castaneum</i>        | XP_008199501.1 (CLK isoform X1) | NP_001107795.1               | NP_001106933.1                                       | NP_001106934.1    | XP_008201051.1 | NP_001076794.1                                                                                         | -                           | -                 | -                 | -                           |
| <i>Xenopus laevis</i>             | NP_001083854.2                  | AAW80970.1 (BMAL1)           | NP_001081098.1 (PER2)                                | -                 | XP_018102910.1 | NP_001081129.1 (CRY1); NP_001082139.1 (CRY2a); AAK94667.1 (CRY2b)                                      | -                           | -                 | -                 | -                           |

**Table S4.** Accession numbers for protein sequences included in the phylogenetic analyses. Protein sequences of the molecular clock components from *Drosophila melanogaster*, *Apis mellifera*, *Antheraea pernyi*, *Danaus plexippus*, *Daphnia pulex*, *Macrobrachium rosenbergii*, *Eurydice pulchra*, and *Tigriopus californicus* were used to query the database. Orthologues to *E. superba* clock components were retrieved from NCBI databases (<https://www.ncbi.nlm.nih.gov>). For *Daphnia pulex*, protein sequences were downloaded from FleaBase (<http://wfleabase.org>). For *Calanus finmarchicus* we used the contigs published by Christie *et al.* (9). Legend: - = not used or not available.

| Construct Name                   | Vector           | Enzymatic digestion | Tag  | Tag position | Expressed proteins                                       | Primers (5'->3')                                                                                                                         |
|----------------------------------|------------------|---------------------|------|--------------|----------------------------------------------------------|------------------------------------------------------------------------------------------------------------------------------------------|
| pEsClk                           | pAc5.1/V5-HisA   | EcoRI; NotI         | FLAG | C-ter        | <i>EsCLOCK</i> /FLAG                                     | F:CAGTGTGGTGGAAATTCATGTACGAAGAAGAAAGCATT<br>R:TAGACTCGAGCGGCCGCTTACTTGTGCGTCATCGTCTTTG<br>TAGTCCTTCTTGGGTGGTAGCTGTGG                     |
| pEsCyc/Bmal                      | pAc5-STABLE2-neo | EcoRI; NotI         | His  | C-ter        | <i>EsCYCLE</i> /His;<br>GFP; neo                         | F:CAGTGTGGTGGAAATTCATGTTCCGGTCTGGGGAATTAT<br>R:GCGTCCTTCGCGGCCGCGCTGGTGGTGGTGGTGGTGGT<br>GGCAGTGGCCATGGCAGATG                            |
| p dClk                           | pAc5.1/V5-HisA   | EcoRI; NotI         | FLAG | C-ter        | <i>dCLOCK</i> /FLAG                                      | F:CAGTGTGGTGGAAATTCATGGACGACGAGAGCGACGAC<br>R:TAGACTCGAGCGGCCGCTTACTTGTGCGTCATCGTCTTTG<br>TAGTCCTTACTACTGCCTGGGGCTGT                     |
| p dCyc                           | pAc5-STABLE2-neo | EcoRI; NotI         | His  | C-ter        | <i>dCYCLE</i> /His; GFP;<br>neo                          | F:CAGTGTGGTGGAAATTCATGGAAGTTCAGGAGTCTCTGC<br>R:GCGTCCTTCGCGGCCGCGCTGGTGGTGGTGGTGGTGGTGA<br>AGAAGACGGAGTTCTTGGC                           |
| pEsClk <sup>1-1117</sup>         | pAc5.1/V5-HisA   | EcoRI; NotI         | FLAG | C-ter        | <i>EsCLOCK</i> <sup>1-1117</sup> /<br>FLAG               | F:CAGTGTGGTGGAAATTCATGTACGAAGAAGAAAGCATT<br>R:TAGACTCGAGCGGCCGCTTACTTGTGCGTCATCGTCTTTG<br>TAGTCCTTGGGGTAGCTGCACGGACAA                    |
| pEsClk <sup>1-863</sup>          | pAc5.1/V5-HisA   | EcoRI; NotI         | FLAG | C-ter        | <i>EsCLOCK</i> <sup>1-863</sup> /<br>FLAG                | F:CAGTGTGGTGGAAATTCATGTACGAAGAAGAAAGCATT<br>R:TAGACTCGAGCGGCCGCTTACTTGTGCGTCATCGTCTTTG<br>TAGTCGCTGACCATGGATCCATAAG                      |
| pEsClk <sup>1-685</sup>          | pAc5.1/V5-HisA   | EcoRI; NotI         | FLAG | C-ter        | <i>EsCLOCK</i> <sup>1-685</sup> /<br>FLAG                | F:CAGTGTGGTGGAAATTCATGTACGAAGAAGAAAGCATT<br>R:TAGACTCGAGCGGCCGCTTACTTGTGCGTCATCGTCTTTG<br>TAGTCGCTCCTCTTGGAGGAGGAGG                      |
| pEsClk <sup>1-500</sup>          | pAc5.1/V5-HisA   | EcoRI; NotI         | FLAG | C-ter        | <i>EsCLOCK</i> <sup>1-500</sup> /<br>FLAG                | F:CAGTGTGGTGGAAATTCATGTACGAAGAAGAAAGCATT<br>R:TAGACTCGAGCGGCCGCTTACTTGTGCGTCATCGTCTTTG<br>TAGTCGCTCCGCTATGGATCTACGTTG                    |
| pEsCyc/<br>Bmal <sup>1-629</sup> | pAc5-STABLE2-neo | EcoRI; NotI         | His  | C-ter        | <i>EsCyc/Bmal</i> <sup>1-629</sup> /<br>His;<br>GFP; neo | F:CAGTGTGGTGGAAATTCATGTTCCGGTCTGGGGAATTAT<br>R:GCGTCCTTCGCGGCCGCGCTGGTGGTGGTGGTGGTGGTGC<br>CCCCCGCCCCATCACCTGC                           |
| pEsPer                           | pAc5-STABLE2-neo | EcoRI; NotI         | Myc  | C-ter        | <i>EsPERIOD</i> /Myc;<br>GFP; neo                        | F:CAGTGTGGTGGAAATTCATGACTGAAAATGAGAGATCT<br>R:GCGTCCTTCGCGGCCGCCAGATCCTTCTGAGATGA<br>GTTTTTGTCTGAGTCCGAGGAGTCTCTACC                      |
| pEsTim                           | pAc5.1/V5-HisA   | EcoRI; NotI         | V5   | C-ter        | <i>EsTIMELESS</i> /<br>V5                                | F:CAGTGTGGTGGAAATTCATGGAGTGGATGATGATGAAC<br>R:TAGACTCGAGCGGCCGCTTACGTAGAATCGAGACCGAG<br>GAGAGGGTTAGGGATAGGCTTACCGTGAAGTGAGCTGGC<br>GCAGG |
| pEsCry1                          | pAc5.1/V5-HisA   | EcoRI; NotI         | HA   | C-ter        | <i>EsCRY1</i> /HA                                        | F:TCCAGTGTGGTGGAAATTCATGACCAACTGTTGTGTGA<br>G<br>R:CGGCCGCCACTCGAGTTAAGCGTAATCTGGAACATCGTA<br>TGGGTAACAGACATTGTGTTGACATTGATC             |
| pEsCry2                          | pAc5.1/V5-HisA   | EcoRI; NotI         | Myc  | C-ter        | <i>EsCRY2</i> /Myc                                       | F:TCCAGTGTGGTGGAAATTCATGACGAGAGGAGGAGAGAA<br>ACATG<br>R:CGGCCGCCACTCGAGTTAAGCGTAATCTGGAACATCGTA<br>TGGGTAGGCCGCTGCATTTGCTGTGT            |

**Table S5.** Main features for the generation of the constructs used for the functional characterization of the krill circadian clock components.

| Transcript             | Forward Primer (5'→3')      | Reverse Primer (5'→3')   |
|------------------------|-----------------------------|--------------------------|
| <i>EsClock</i>         | GCTGCAGCAAATGATAATGC        | TGCCATATTGGCCATAACT      |
| <i>EsCycle</i>         | TTTTGATTTAAGGCATTTTTTCATCTA | CCCAGTCTCACGATTCTAGCTACT |
| <i>EsPeriod</i>        | GCAGCTATGCCCAACTTTAATC      | GGACTAGCAACAGGGACATTTT   |
| <i>EsTimeless1</i>     | TTGAAGACTCTCCTACAATGATGG    | TACAGAGCCCGCATGACA       |
| <i>EsCryptochrome2</i> | TCATGAACCATGGACTGCAC        | GGTGGACACGACTTCAACAA     |
| Spike                  | AATCCCCGACTCAGACCCAT        | GGCTTCGGGAAATCAGCTGA     |

|                |                                                                                                                                                                                                              |
|----------------|--------------------------------------------------------------------------------------------------------------------------------------------------------------------------------------------------------------|
| Spike sequence | TGATGGATGCCACCAATATGCCAGCTGTCAAAGCCATCATATATCAGTATATGGAAGAGATTTATCATAGAA<br>TCCCCGACTCAGACCCATCTTCTAGCAAACAAGGCAGATCATCTCCACCATCCGGACGCAGAATCTTCCC<br>AACTGTCAGCTGATTTCCCGAAGCCACTACTCCCCATCTACCTGTCTGTTGTCA |
|----------------|--------------------------------------------------------------------------------------------------------------------------------------------------------------------------------------------------------------|

**Table S6.** Primers for quantitative real-time PCR experiments and spike synthetic oligoribonucleotide sequence.
